# Supplementary material for: Comprehensive transcriptomic analysis of cell lines as models of primary tumors across 22 tumor types
Source: Springer Nature journal article supplement (doi:10.1038/s41467-019-11415-2), 2019-08-08
Supplement: 41467_2019_11415_MOESM1_ESM.pdf [file 41467_2019_11415_MOESM1_ESM.pdf]

# **Comprehensive transcriptomic analysis of cell lines as models of primary samples across 22 tumor types**

**Yu et al.**

## Supplementary Table

Supplementary Table 1: Number of differentially expressed genes between primary tumor samples and cell lines

| Disease  | Genes upregulated in TCGA | Genes upregulated in CCLE | Total DEG |
|----------|---------------------------|---------------------------|-----------|
| BLCA     | 1088                      | 866                       | 1954      |
| BRCA     | 1076                      | 864                       | 1940      |
| CHOL     | 1002                      | 1112                      | 2114      |
| COADREAD | 1074                      | 780                       | 1854      |
| DLBC     | 1644                      | 1343                      | 2987      |
| ESCA     | 697                       | 460                       | 1157      |
| HNSC     | 773                       | 532                       | 1305      |
| GBM      | 1621                      | 1401                      | 3022      |
| KIRC     | 1661                      | 1586                      | 3247      |
| LAML     | 755                       | 769                       | 1524      |
| LGG      | 2030                      | 2046                      | 4076      |
| LIHC     | 1829                      | 1772                      | 3601      |
| LUAD     | 1110                      | 884                       | 1994      |
| LUSC     | 1079                      | 716                       | 1795      |
| MESO     | 1144                      | 1116                      | 2260      |
| OV       | 1238                      | 852                       | 2090      |
| PAAD     | 1369                      | 1000                      | 2369      |
| PRAD     | 1299                      | 1343                      | 2642      |
| SKCM     | 790                       | 565                       | 1355      |
| STAD     | 1023                      | 551                       | 1574      |
| THCA     | 1685                      | 1677                      | 3362      |
| UCEC     | 1207                      | 854                       | 2061      |

## Supplementary Figures

### TCGA data corrected for sequencing technologies using ComBat

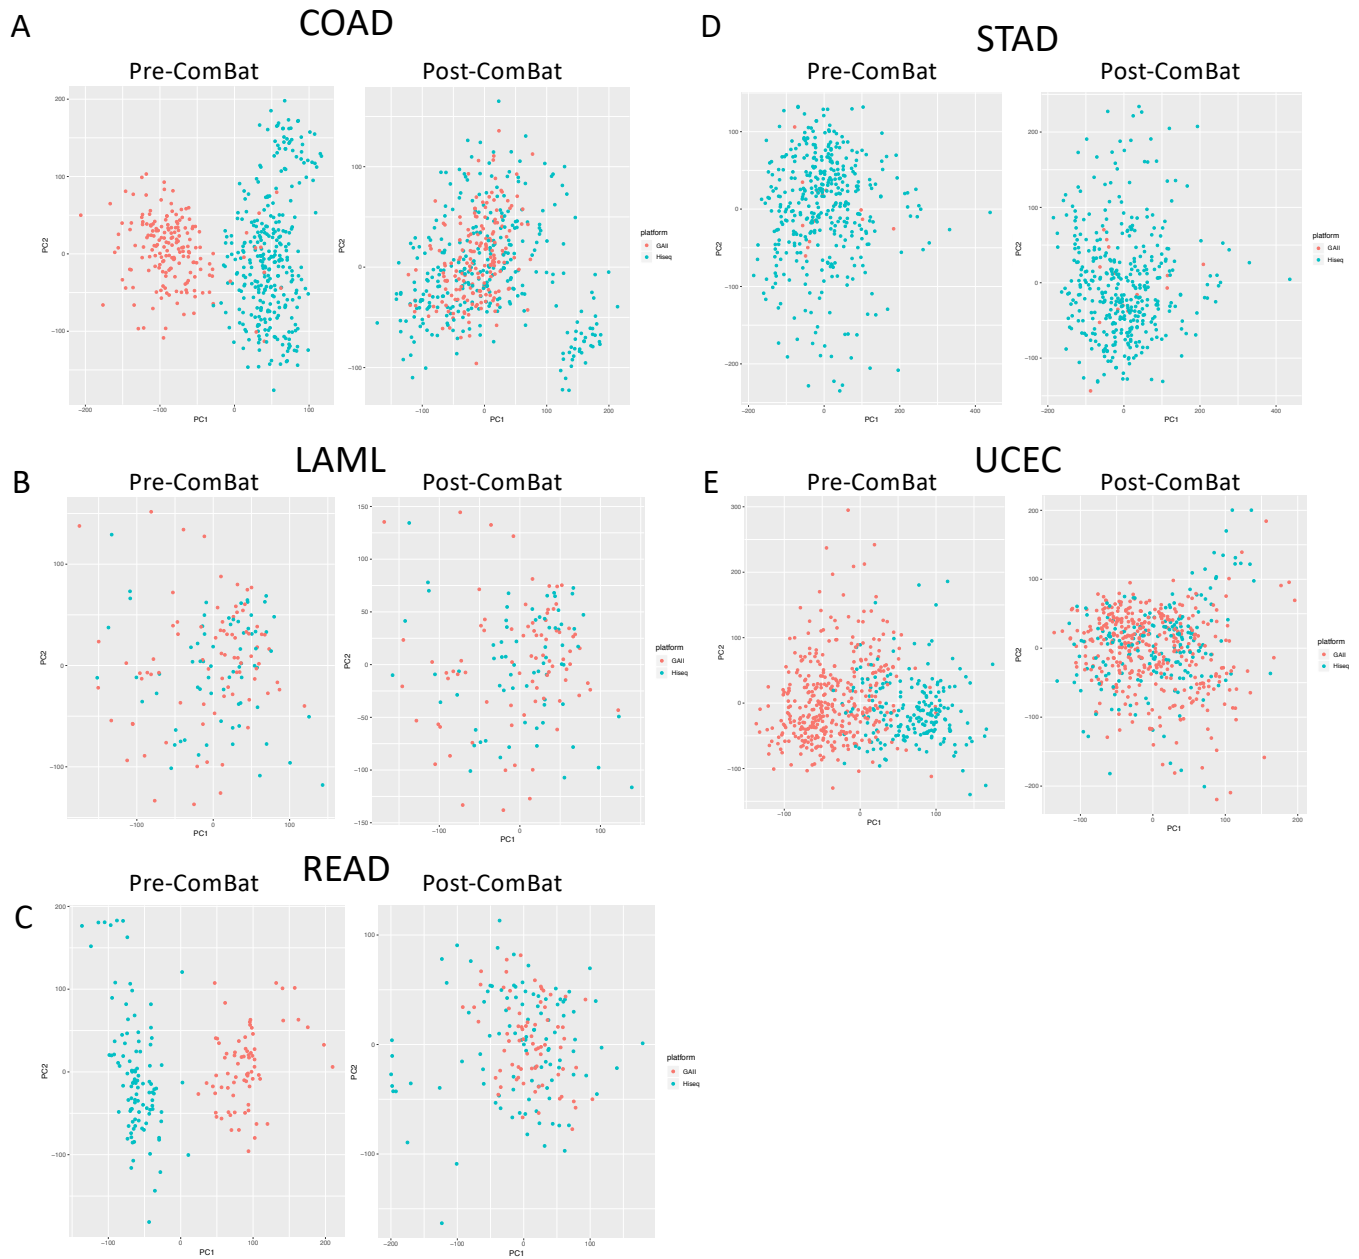

**Supplementary Figure 1.** Sequencing platform batch effects were corrected for using ComBat in the following tumors types: COAD (A), LAML (B), READ (C), STAD (D), and UCEC (E). Samples sequenced on Illumina's Genome Analyzer II Platform (GAI) are in red and samples sequenced on Illumina's HiSeq platform are in turquoise. The plots on the left shows PC1 and PC2 of the samples before ComBat correction and the plots on the right shows the samples after ComBat correction.

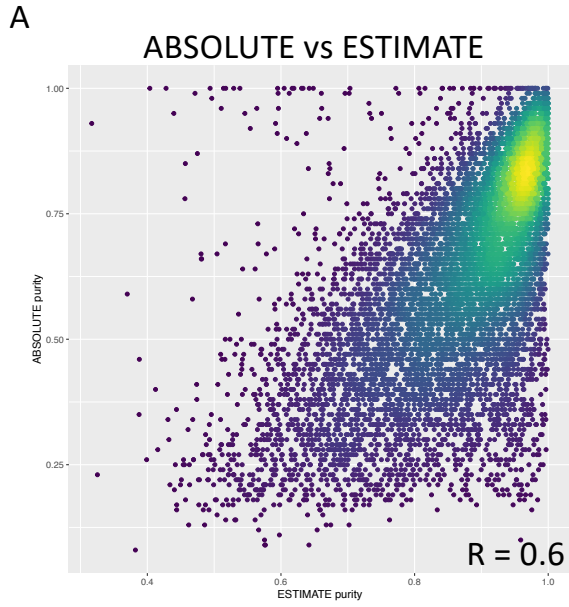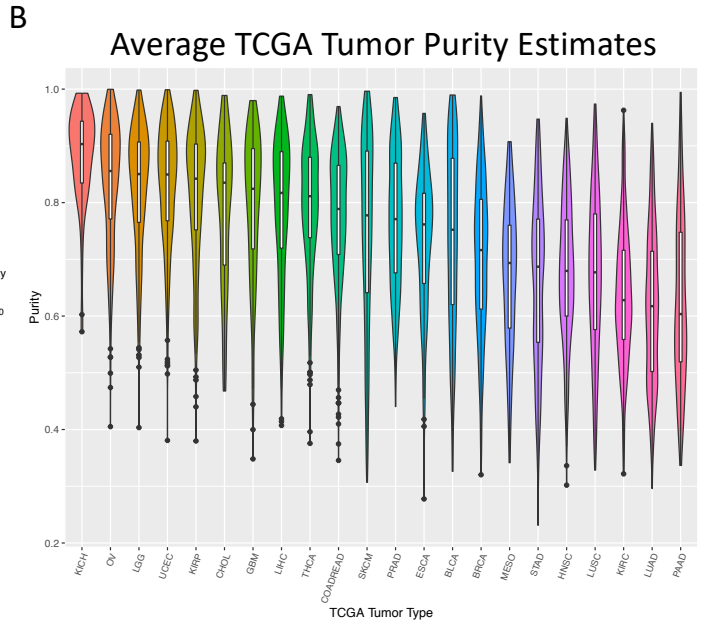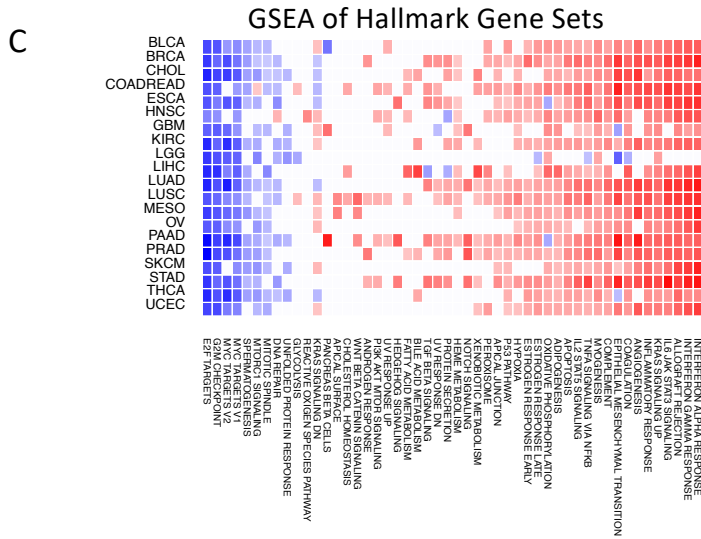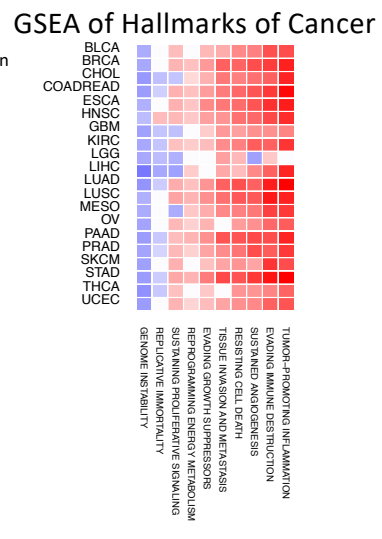

### D Correlations after correcting for tumor purity

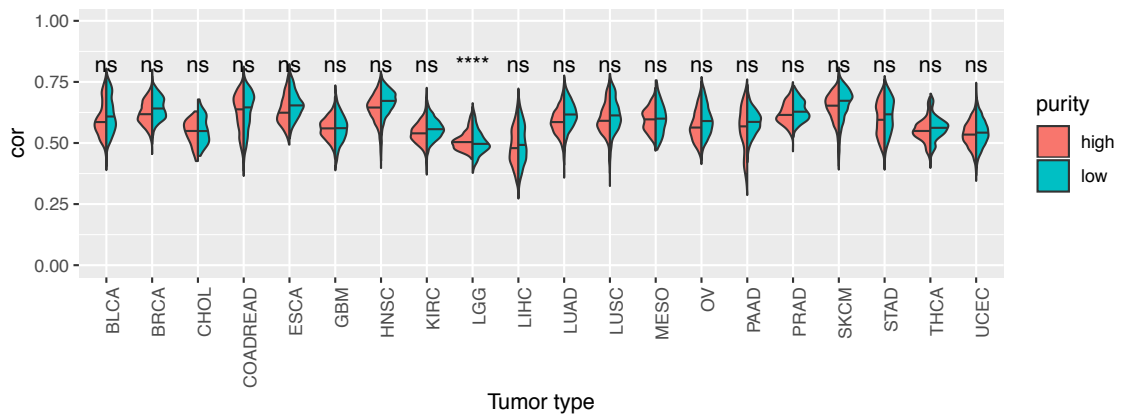

**Supplementary Figure 2.** Confounding effect of tumor purity on GSEA and correlation analysis. A. Purity estimates calculated using ESTIMATE (x-axis) and ABSOLUTE (y-axis) are highly correlated ( $R = 0.6$ ,  $p$ -value  $< 2.2e-16$ ). B. Violin plots showing the purity estimates of the primary tumors separated by tumor type. C. (left) Gene Set Enrichment Analysis (GSEA) of differential expression results without purity as a covariate between primary tumor samples and cell lines in hallmark gene sets from MSigDB. NES are shown for pathways with  $FDR < 5\%$ . Before adjusting for tumor purity, immune related pathways are strongly enriched in primary tumor samples. (right) Gene Set Enrichment Analysis (GSEA) of differential expression results without purity as a covariate between primary tumor samples and cell lines in hallmarks of cancer pathways. NES are shown for pathways with  $FDR < 5\%$ . D. After adjusting for tumor purity, correlations between cell lines and high purity primary tumor samples (red) are significantly higher than correlations between cell lines and low purity primary tumor samples (turquoise) in only 1/20 tumor types using the one-sided Wilcoxon rank sum test. P-values are indicated by symbols above the violin plots with ns corresponding to  $p$ -value  $> 0.05$  and four stars corresponding to  $p$ -value  $\leq 0.0001$ .

A

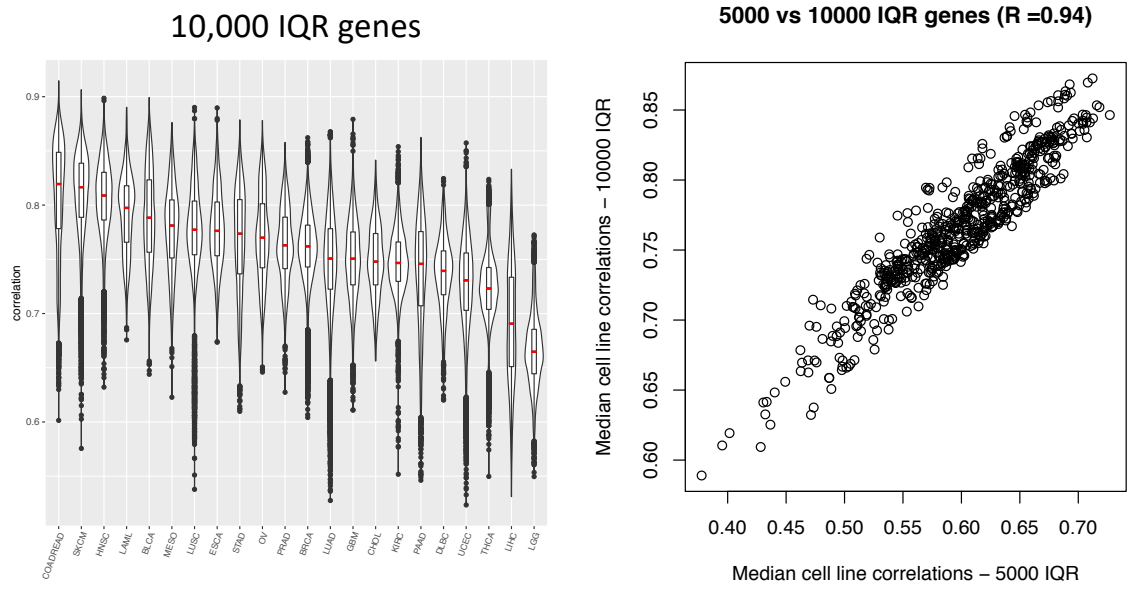

B

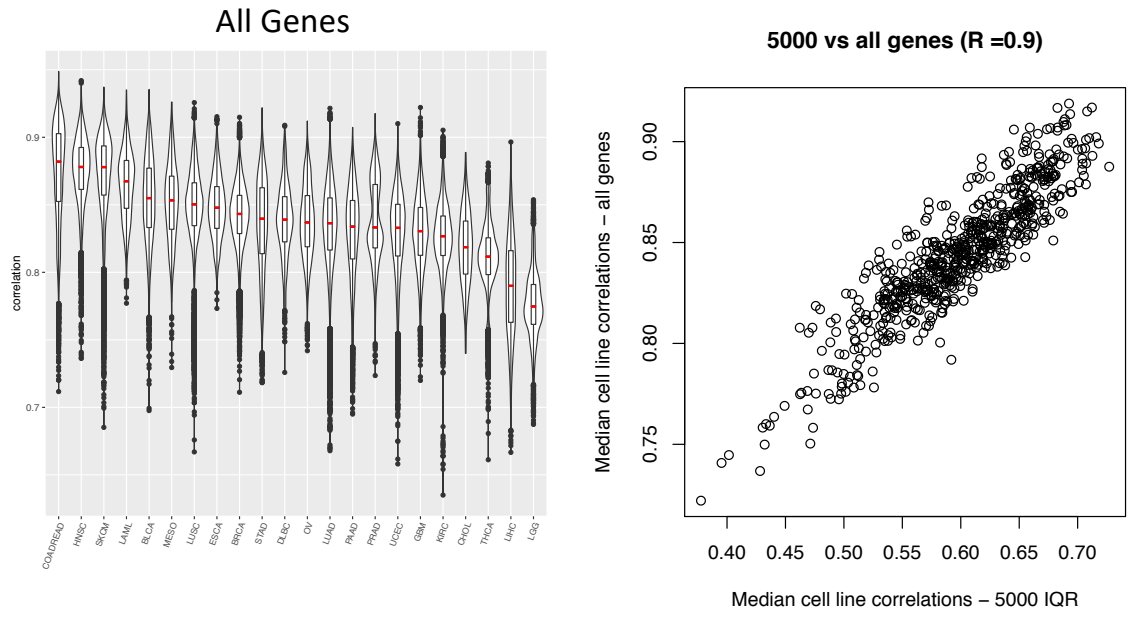

**Supplementary Figure 3.** Varying the number of genes used in the correlation analysis does not significantly affect the results. A. Correlations calculated using 10,000 most variable genes (left) separated by tumor type do not differ significantly from correlations calculated using 5,000 most variable genes. The median correlation coefficients of each cell line compared to their primary tumor samples (right) are highly correlated when using 5,000 IQR genes (x-axis) to 10,000 IQR genes (y-axis) (Pearson correlation = 0.94, p-value < 2.2e-16). B. Correlations calculated using all genes (left) do not differ significantly from correlations calculated using 5,000 most variable genes. The median correlation coefficients of each cell line compared to their primary tumor samples (right) are highly correlated when using 5,000 IQR genes (x-axis) to all genes (y-axis) (Pearson correlation = 0.90, p-value < 2.2e-16).

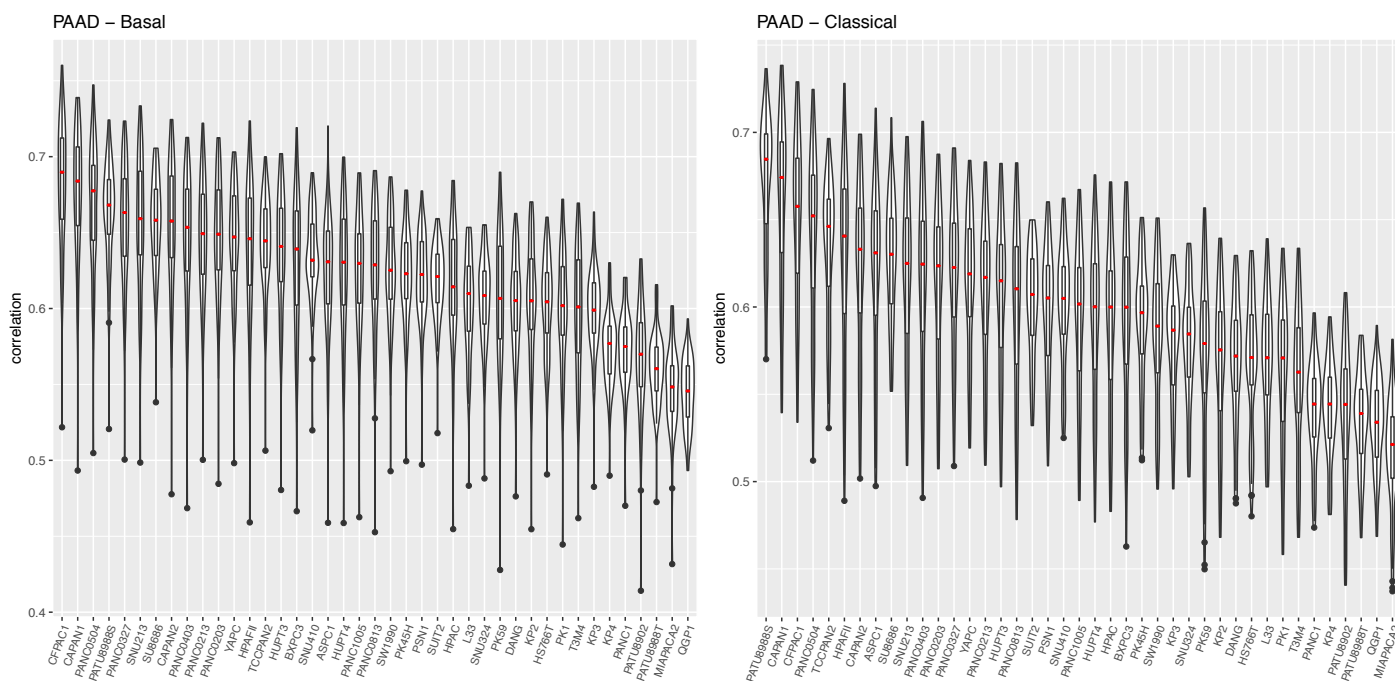

**Supplementary Figure 4.** Spearman's correlations between PAAD cell lines and PAAD basal primary tumors (left) and PAAD classical primary tumors (right) using the 5,000 most variable genes. The correlations are separated by cell lines (x-axis). In the overlaid boxplot, the red center line displays the median, the box limits display the upper and lower quartiles, and the whiskers display 1.5 times the interquartile range.
